1 **Long-term surveillance defines spatial and temporal patterns**  
2 **implicating *Culex tarsalis* as the primary vector of West Nile virus in**  
3 **Iowa, USA**

4 **Brendan M. Dunphy<sup>1</sup>, Kristofer B. Kovach<sup>1</sup>, Ella J. Gehrke<sup>1</sup>, Eleanor N. Field<sup>1</sup>,**  
5 **Wayne A. Rowley<sup>1</sup>, Lyric C. Bartholomay<sup>2</sup>, and Ryan C. Smith<sup>1\*</sup>**

6

7

8 <sup>1</sup>Department of Entomology, Iowa State University, Ames, Iowa, 50011, USA

9 <sup>2</sup>Department of Pathobiological Sciences, University of Wisconsin, Madison, WI 53706

10

11

12 \*Correspondence: [smithr@iastate.edu](mailto:smithr@iastate.edu)

13

14

15

16 Running Title: Patterns of WNV transmission in Iowa

17 **Abstract**

18 West Nile virus (WNV) has become the most epidemiologically important mosquito-  
19 borne disease in the United States, causing ~50,000 cases since its introduction in  
20 1999. Transmitted primarily by *Culex* species, WNV transmission requires the complex  
21 interplay between bird reservoirs and mosquito vectors, with human cases the result of  
22 epizootic spillover. To better understand the intrinsic factors that drive these  
23 interactions, we have compiled infection data from sentinel chickens, mosquito vectors,  
24 and human cases in Iowa over a 15 year period (2002-2016) to better understand the  
25 spatial and temporal components that drive WNV transmission. Supplementing these  
26 findings with mosquito abundance, distribution, and host preferences data, we provide  
27 strong support that *Culex tarsalis* is the most important vector of human WNV infections  
28 in the region. Together, our analysis provides new insights into WNV infection patterns  
29 in multiple hosts and highlights the importance of long-term surveillance to understand  
30 the dynamics of mosquito-borne-disease transmission.

## 31 **Introduction**

32 In an era of increased concern over mosquito-borne viruses, West Nile virus (WNV)  
33 continues to have the largest epidemiological impact in the United States, causing  
34 ~50,000 cases and over 2,100 deaths since its introduction in 1999 (1). Therefore, the  
35 annual occurrence of WNV presents a continual public health threat across the  
36 continent.

37 WNV persists in nature through a host cycle that involves bird reservoirs and *Culex*  
38 mosquito vectors, with humans serving as dead-end hosts through the bite of an  
39 infected mosquito (2). Both abiotic factors (e.g.- landscape, climate, and seasonality)  
40 and biotic factors (e.g.- community composition of bird reservoirs and mosquito vectors,  
41 species abundance, and inter-species interactions) influence WNV infection dynamics  
42 across the United States (3–7). Human cases of WNV have been reported across all 48  
43 states of the contiguous US, yet specific states or geographic regions have been  
44 impacted by a disproportionate number of cases (1). Three states (California, Colorado,  
45 and Texas) comprise more than 36% of the total number of reported WNV cases, while  
46 states of the Upper Midwest, particularly South Dakota and Nebraska, have consistently  
47 displayed among the highest incidence rates (cases per capita) in the country (1). As a  
48 result, it is of great importance to understand the epidemiological patterns of WNV  
49 across the country (8).

50 Previous reports describing patterns of WNV transmission in densely populated  
51 urban/suburban areas (9–12) and rural environments (13, 14), suggest that distinct  
52 mechanisms of peridomestic and sylvatic transmission may influence the epidemiology  
53 of WNV across the US (8). This is supported by considerations of land use and  
54 landscape ecology, which serve as important determinants in shaping the geographical  
55 distributions of mosquito vectors (15–19). Of the *Culex* species implicated as vectors of  
56 WNV, *Culex pipiens*, *Culex quinquefasciatus*, and *Culex restuans* are routinely  
57 associated with urbanized settings (20, 21) while *Culex tarsalis* is most common in rural  
58 habitats (15, 16, 22). With known differences in vector competence (23, 24), the spatial  
59 distributions of these *Culex* species can have profound impacts on patterns of WNV  
60 transmission at the local or regional level. Factors influencing WNV transmission have

61 been broadly described across the United States (8, 25–27), yet our understanding of  
62 WNV transmission in the Midwest has heavily relied on studies of the Chicago  
63 metropolitan area (12, 28–33) with only limited characterization of WNV epidemiology  
64 and transmission dynamics in other locations of the Midwest (14, 15, 34–36).

65 Building on initial reports describing WNV transmission in Iowa from 2002-2006 (15), we  
66 have assembled an extensive 15 year study of WNV transmission for the state (2002 -  
67 2016) examining WNV infection data from human, sentinel chicken, and mosquito  
68 hosts. Combined with mosquito abundance, distribution, and host selection data, our  
69 comprehensive resources offer the unique ability to investigate the concurrent impacts  
70 of multiple ecological factors on human WNV disease cases. By examining host  
71 infection rates from spatial and temporal perspectives, we have determined when and  
72 where WNV is most actively being transmitted in Iowa, which suggests underlying biotic  
73 and abiotic mechanisms that likely influence WNV transmission. Together, these data  
74 provide strong support that *Cx. tarsalis* is the predominant vector of human WNV  
75 transmission in Iowa. These analyses provide new insights into WNV transmission  
76 dynamics in the Upper Midwest region and highlight the importance of long-term  
77 surveillance to understand mosquito borne-disease.

## 78 **Materials & Methods**

### 79 **West Nile virus surveillance program**

80 Since 2002, the Medical Entomology Lab at Iowa State University has conducted WNV  
81 surveillance for the state of Iowa through cooperative efforts with the Iowa Department  
82 of Public Health, the State Hygienic Lab, and city- or county-level municipalities around  
83 the state, where field operations occurred. Data presented herein were collected over  
84 the 15 year period from 2002 to 2016, generally between mid-May and early October  
85 (approximately weeks 20 - 42) of each year as the period of mosquito activity in Iowa.

### 86 **Mosquito collections and identification**

87 Adult mosquitoes were collected across the state using a variety of trapping methods to  
88 assess population dynamics or to monitor WNV infection rates. New Jersey light traps  
89 (NJLTs) were used to measure mosquito abundance, while CO<sub>2</sub>-baited CDC light traps

90 (CDC traps) or grass infusion-baited gravid traps were used to collect mosquitoes for  
91 subsequent WNV testing. All three trap types were used for the duration of the 15 year  
92 study period, with the exception of a two year period in which CDC trapping did not  
93 occur (2014 and 2015) and one year (2002) in which gravid traps were not used.  
94 Additional trapping methods relying on Mosquito Magnets (2007–2009) or BG-Sentinel  
95 traps (2016) were selectively used across the state. All traps were maintained and  
96 operated by either Iowa State University personnel or local municipal collaborators.

97 Mosquito samples were identified according to morphological characteristics described  
98 for North American mosquitoes (37). To keep data consistent across the 15 year  
99 trapping period and the difficulty in distinguishing adult female *Cx. pipiens*, *Cx.*  
100 *quinquefasciatus*, *Cx. restuans*, and *Cx. salinarius* (especially when samples are in poor  
101 condition), these species were collectively identified as “*Cx. pipiens* group” due to the  
102 difficulty in distinguishing these species as adults, especially in the large volumes  
103 processed in our study with specimens frequently in poor physical condition (38, 39).  
104 This nomenclature was used throughout the study.

#### 105 **West Nile virus (WNV) testing in mosquitoes**

106 Mosquito samples collected from CDC and gravid traps were routinely used for WNV  
107 testing during the 15 year sample period. Additional samples collected from BG-Sentinel  
108 and Mosquito Magnet traps were respectively tested for only a single season or a small  
109 period of 3 years. Following collection, mosquitoes were stored at either -20 °C or -80  
110 °C by our collaborators before shipping in insulated parcels with frozen ice packs or dry  
111 ice. To preserve samples during identification and handling, mosquitoes were sorted on  
112 refrigerated tabletops. After identification, mosquitoes of the same species were  
113 grouped together into pools not exceeding 50 mosquitoes according to trap type, trap  
114 site and collection week. Mosquito pools were sent to the State Hygienic Laboratory  
115 (Iowa City, IA) for WNV detection by quantitative RT-PCR. Only data collected for *Culex*  
116 species that regularly tested positive for WNV (i.e., *Cx. pipiens* group, *Cx. tarsalis*, and  
117 *Cx. erraticus*) were used in this study and were collectively referred to as “*Culex*”  
118 species (Table S1).

119 Mosquito infection rates were calculated as minimum infection rates (MIR) from bias-  
120 corrected maximum likelihood estimates using the CDC-provided Microsoft Excel add-in  
121 for calculation of pooled infection rates (40). Mosquito infection data were parsed  
122 according to week of the year, mosquito species, trap type, and county of collection.

### 123 **Sentinel chicken seroprevalence**

124 Sentinel chickens were used in participating Iowa municipalities from 2002 to 2013 to  
125 monitor WNV seroprevalence in local wild bird reservoirs. At the beginning of each  
126 surveillance year, baseline bleeds were performed on each chicken to ensure the  
127 absence of WNV infection. Sentinel “flocks” consisting of 8 chickens were deployed to  
128 sites around the state, based on the availability of municipal collaborators to maintain  
129 the flocks. Weekly blood draws from each individual chicken (target volume – 0.5 mL)  
130 were taken to gauge infection status through the summer. All blood samples were sent  
131 to the State Hygienic Laboratory (Iowa City, IA) to test for the detection of IgM  
132 antibodies to WNV using a MAC-ELISA assay as previously described (41).  
133 Seroprevalence was calculated by dividing the number of infected chickens by the total  
134 number of sampled chickens in a population. Animal procedures were approved by the  
135 Iowa State University Institutional Animal Care and Use Committee protocol #7-2-  
136 5196G to L. Bartholomay.

### 137 **Human case reporting**

138 As a mandatory reportable disease, human cases of WNV were reported to the Iowa  
139 Department of Public Health from physicians and health clinics around the state, before  
140 forwarding information to the Centers for Disease Control (CDC). All human case data  
141 were reported at the county level by week of the year (except 2002, which lacked  
142 temporal data). Human incidence was calculated by dividing the number of reported  
143 human cases by the human population (Iowa county or region) and normalized per  
144 100,000 people.

### 145 **Mosquito blood meal analysis**

146 Mosquitoes containing a visible blood meal that were collected in CDC light traps or  
147 gravid traps at various locations throughout the state were preserved at -80°C. This

148 included all *Cx. tarsalis* blood-fed samples in our possession collected from 2007 to  
149 2011 and in 2017, a total of 93 samples. A selection of 214 blood-fed *Cx. pipiens* group  
150 samples collected from 2015 and 2017 were similarly processed. DNA was isolated  
151 from individual mosquitoes using the Marriot DNA extraction procedure (42). DNA from  
152 the *Cx. tarsalis* samples were validated using actin primers (43), while *Cx. pipiens* group  
153 samples were speciated by PCR analyses as previously (44) to confirm their  
154 identification as *Culex restuans*, *Culex pipiens*, or *Culex salinarius*. Positive DNA  
155 amplification was confirmed in 92 of 93 *Cx. tarsalis* and 159 of 214 *Cx. pipiens* group  
156 samples.

157 To determine the vertebrate host source of the mosquito blood meals, two methods  
158 were employed. For *Cx. tarsalis*, a PCR-RFLP assay in which cytochrome B (cytB)  
159 sequences were amplified by PCR, then digested with *TaqI* to distinguish between  
160 vertebrate species was performed on the samples (45). However, due to similarities in  
161 the *Culex pipiens* group cytB sequences with the associated PCR-RFLP primers, this  
162 assay could not distinguish vertebrate blood samples. As a result, the *Culex pipiens*  
163 group samples were evaluated by PCR using individual avian, mammal, and human  
164 primer sets as previously (31, 46). PCR reactions were performed using DreamTaq  
165 (Thermo Fisher) and visualized by electrophoresis on 1.5% agarose gels.

### 166 **Mapping of WNV infection data and mosquito abundance data**

167 To visualize host (human, chicken, and mosquito) infection rates and mosquito  
168 abundance on a geographic scale, county-specific values were mapped using ArcMap  
169 10.4.1 (Esri ArcGIS). Values of human incidence, sentinel chicken seroprevalence,  
170 mosquito MIR, and mosquito abundance ratios were interpolated between counties  
171 according to the inverse distance weighted (IDW) method using centroid locations of the  
172 corresponding counties as previously described (47). To enhance the visual display, a  
173 2% clip and gamma stretch were applied.

### 174 **Statistical analyses**

175 All variables examined in this study (host infection rates by week, year, region, and  
176 county; county-level mosquito abundance measures) were found to have non-normal

177 distributions, with the exception of regional mosquito MIR differences. As a result, non-  
178 parametric methods were chosen for all statistical analyses to maintain consistency.  
179 Significance of relationships was determined with a 95% confidence interval ( $P < 0.05$ ,  
180 two-tailed). A Wilcoxon signed-rank test was performed to determine differences in  
181 annual host infection rates between Iowa regions and between *Culex* species. Data  
182 were analyzed and prepared using GraphPad Prism 6 (GraphPad Software).

## 183 Results

### 184 WNV displays defined temporal patterns in its human, avian, and mosquito hosts

185 To better understand the seasonality of WNV transmission in Iowa, fifteen years of  
186 WNV surveillance data were analyzed from the three major host species (humans,  
187 birds, and mosquitoes) to identify peak periods of WNV activity. Between mid-May and  
188 early October (approximately weeks 20-42), mean weekly WNV activity is displayed for  
189 human cases (Fig. 1A), chicken seroprevalence (Fig.1B), and mosquito infection rates  
190 (Fig. 1C). Across host species, WNV activity followed similar temporal patterns reaching  
191 detectable levels approximately in early June (week 23) and amplifying progressively  
192 through the summer months. Human and mosquito infection rates peaked in early  
193 September (humans, week 36; mosquito, week 37), then rapidly declined to barely  
194 detectable levels in October (week 40). In contrast, chicken seroprevalence continued  
195 to rise through late September and early October when human incidence and mosquito  
196 infection rates have already rapidly declined (Fig. 1). Seroprevalence was not measured  
197 beyond this point as it marked the end of the field season.

198 Relationships between host infection patterns were more closely examined using  
199 regression analyses of historical infection rates (weeks 20-40) to determine the strength  
200 of these multivariate interactions. A linear model of chicken seroprevalence was limited  
201 in its ability to account for variation in human incidence, yet was greatly improved when  
202 examined as a non-linear relationship to account for the late-season decline in human  
203 incidence while seroprevalence continued to increase (Fig. 1D). Similarly, a non-linear  
204 analysis improved the ability of sentinel chicken seroprevalence to estimate variation in  
205 *Culex* minimum infection rates (MIR) (Fig. 1E). Lastly, *Culex* MIR accounted for 71% of  
206 the seasonal variation in human incidence when examined as a linear relationship (Fig.



207 1F). Together, these data suggest that both linear and non-linear relationships of host  
208 infection rate data account for the dynamic nature of WNV activity. Traditionally used as  
209 tools for arbovirus surveillance (48, 49), these data provide strong support for the  
210 continued use of sentinel chickens and the use of mosquito infection rates to actively  
211 monitor WNV activity.

### 212 **Regional differences in WNV transmission**

213 WNV infections were then examined across the state to identify spatial patterns of  
214 endemicity and regions of higher risks for human infection. To approach this question,  
215 mean annual infections rates were mapped for each host species (human, chicken,  
216 mosquito) at the county level for all locations in which data have been collected from  
217 2002 to 2016 (Fig. 2). Annual infection rates were also broken down by region, with  
218 additional comparisons of infection intensity with respect to time (Fig. 2). From these  
219 data, the human incidence of WNV was determined to be the highest in western Iowa,  
220 where infection rates were four times that of central Iowa and seven times that of  
221 eastern Iowa (Fig. 2A). Central Iowa also displayed significantly higher human incidence  
222 than in eastern Iowa (Fig. 2A). Temporal analyses of human WNV incidence further  
223 support this observation, demonstrating that incidence rates in western Iowa were  
224 higher and amplified faster than in other geographic regions of the state (Fig. 2A).  
225 These data confirm previous reports of WNV incidence in Iowa from 2002 to 2006 (15),  
226 which similarly define a distinct gradient where the highest incidence rates are found in  
227 western Iowa and the lowest incidence in eastern Iowa. This regional dichotomy  
228 suggests that important entomological and ecological differences across the state must  
229 influence higher rates of enzootic spillover of WNV in western Iowa.

230 Seroconversion rates in sentinel chickens were also highest in sentinel chickens in  
231 western Iowa, displaying twice the seroconversion rates than those in central and  
232 eastern Iowa (Fig.2B). However, unlike human incidence, these hotspots were less  
233 defined with several non-western counties exhibiting high infection rates (Fig. 2B).  
234 Seroconversion in western Iowa occurred earlier in the summer, resulting in infection  
235 rates that were three times greater than those found in other regions by the end of the

236 year (Fig. 2B). No differences in seroconversion were detected between central and  
237 eastern Iowa (Fig. 2B).

238 With similar spatial patterns of WNV in humans and sentinel chickens, we expected that  
239 the MIR of *Culex* species producing WNV<sup>+</sup> mosquito pools (Table S1) would likewise  
240 display a similar pattern across the state. Although the majority of counties with the  
241 highest infection rates were found in western Iowa, we found that the overall geographic  
242 trends in mosquito infection rates were less pronounced (Fig. 2C). Mosquitoes from  
243 western Iowa displayed a greater infection rate than those from central or eastern  
244 regions, yet these differences were not significant (Fig. 2C). Temporal analyses  
245 displayed equivalent amplification of mosquito infections in western and central Iowa,  
246 with much lower mosquito infection rates in the east throughout the year (Fig. 2C).  
247 While consistent with the geographic gradients for human incidence and chicken  
248 seroprevalence, these mosquito infection trends argue that a more detailed analysis of  
249 mosquito species composition on infection rates may be required to delineate potential  
250 differences between *Culex* species as vectors of WNV transmission.

### 251 ***Cx. tarsalis* display higher infection rates than *Cx. pipiens* group mosquitoes**

252 Since the introduction of WNV into Iowa in 2002, *Cx. pipiens* group mosquitoes and *Cx.*  
253 *tarsalis* have comprised 98% of the WNV<sup>+</sup> mosquito pools (Table S1). To better  
254 understand the contributions of these vectors to WNV transmission, we examined  
255 mosquito infection data obtained from mosquitoes collected with gravid or CO<sub>2</sub>-baited  
256 CDC traps. Gravid traps lure mosquitoes seeking a site for oviposition and have been  
257 widely used for monitoring populations of *Cx. pipiens* group species (50). Likewise,  
258 mosquito yields from gravid traps were severely biased towards *Cx. pipiens* group  
259 (99.5% of 93,456 collected; Fig. 3A). However, despite the sparsity of *Cx. tarsalis* data  
260 from gravid trap collections, *Cx. tarsalis* displayed higher infection rates than *Cx. pipiens*  
261 group mosquitoes (Fig. 3B).

262 Generally targeting mosquitoes seeking a blood meal (50), CO<sub>2</sub>-baited CDC traps  
263 resulted in more comparable yields of *Cx. tarsalis* and *Cx. pipiens* group mosquitoes  
264 (Fig. 3C). *Cx. pipiens* group were still the more abundant vector (65.5% of 65,341  
265 collected; Fig. 3C), but these data do not account for potential differences in species

266 distributions throughout the state. Comparisons of mean annual MIR between mosquito  
267 species revealed that the infection rate in *Cx. tarsalis* was significantly higher (~5x) than  
268 that of *Cx. pipiens* group mosquitoes (Fig. 3D). Therefore, *Cx. tarsalis* populations in  
269 Iowa displayed higher infection rates than the *Cx. pipiens* group population during the  
270 entire 15 year study period. This is further supported by laboratory and field-based  
271 studies arguing that *Cx. tarsalis* is one of the most competent vectors of WNV in North  
272 America (24, 51, 52).

### 273 **Blood meal analysis reveals differences in host selection between *Culex* vectors**

274 To examine potential differences in host selection between *Cx. tarsalis* and *Cx. pipiens*  
275 group, we used PCR-based methods to analyze mosquito blood meals (30, 46, 53). Of  
276 the mosquito samples analyzed, only a small percentage resulted in blood meal  
277 identifications using our PCR-based methods (25% of *Cx. tarsalis* [23 of 92] and 20% of  
278 *Cx. pipiens* group [32 of 159] samples). This is likely due to the passive collection of  
279 these blood-fed mosquito samples in which host DNA in the blood meals may have  
280 been digested past the point of PCR identification (54). These limitations prevent us  
281 from making any strong assertions about differences in host preference between these  
282 mosquito vectors. However, our data show that *Cx. tarsalis* feeds predominantly on  
283 birds (~52% of all samples) and humans accounted for a large component (~30%) of  
284 the identified blood meals (Fig. 4). This is in contrast to *Cx. pipiens* group mosquitoes  
285 that collectively displayed stronger selection for non-human mammals and birds, with  
286 humans representing the smallest proportion (~13%) of analyzed samples (Fig. 4).  
287 When further classified by species using a multiplex PCR assay (44), we saw notable  
288 differences within the *Cx. pipiens* group. *Cx. restuans* (which comprised the majority of  
289 samples in our analysis) and *Cx. salinarius* fed mostly on non-human mammals (Fig.  
290 S1), while *Cx. pipiens* samples fed primarily on birds (Fig. S1). Together, these data  
291 suggest that *Cx. tarsalis* may exhibit different preferences for host selection than *Cx.*  
292 *pipiens* group and feed more prevalently on humans (Fig. 4), providing support that *Cx.*  
293 *tarsalis* may serve as a better vector of WNV to humans.

### 294 ***Cx. tarsalis* abundance is strongly correlated with human WNV infection**

295 Expanding on initial mosquito abundance data (15), we further examined *Culex*  
296 mosquito populations across the state to determine the influence of vector abundance  
297 on WNV transmission. Data collected from either CDC or New Jersey Light traps  
298 (NJLTs) were used to calculate historical (2002 to 2016) *Culex* mosquito abundance  
299 ratios used for comparisons to human WNV incidence on a county-specific level (Fig.  
300 5). These data demonstrate that *Cx. tarsalis* comprises a larger proportion of the total  
301 mosquito population in western Iowa than in other regions of the state (Figs. 5A and 5B;  
302 15, 39, 55), and that its relative abundance significantly correlates with human WNV  
303 incidence using either CDC (Fig. 5A) or NJLT trap datasets (Fig. 5B). In contrast, *Cx.*  
304 *pipiens* group was widespread throughout the state, without clear associations to  
305 human incidence (Figs. 5C and 5D). Together, these data demonstrate that human  
306 incidence of WNV was highest in regions where *Cx. tarsalis* was most abundant. When  
307 combined with its higher infection rates (Fig. 3) and greater selection for human hosts  
308 (Fig. 4), these properties provide strong support towards incriminating *Cx. tarsalis* as  
309 the principle vector of the majority of human WNV infections in Iowa.

## 310 Discussion

311 In this study, we provide a comprehensive view of 15 years of WNV transmission in  
312 Iowa (2002 to 2016) following its introduction into the state. With the inclusion of  
313 infection data from both vertebrate and invertebrate hosts, we provide a unique  
314 perspective into the temporal and spatial trends that define WNV transmission in Iowa.  
315 We describe a consistent period of WNV transmission in Iowa from late spring to early  
316 fall, similar to patterns described in other locations of the Midwest (32, 35) and across  
317 the country (9, 27, 56). All host species (human, bird, mosquito) show progressive virus  
318 amplification throughout the summer months, with infection rates peaking in late  
319 summer for humans and mosquitoes, followed by a dramatic decline with the onset of  
320 fall. During this time, WNV remains prevalent in bird populations, which reach peak  
321 levels of infection late into the summer and early fall. These transmission dynamics are  
322 derived from 15 year averages, yet also display unique inter-annual differences in WNV  
323 intensity. The mechanisms driving these infection patterns likely involve interrelated  
324 complexities of physiology and behavior that influence interactions between hosts.

325 Shifts in vector feeding behavior have been previously implicated in driving WNV  
326 transmission from an enzootic cycle to human populations (27), yet other studies  
327 suggest that little change in feeding preferences occur with the emergence of human  
328 cases (31). Therefore, it is unclear how these dynamics may influence human case  
329 incidence in Iowa and the greater Upper Midwest region. Additional questions remain  
330 regarding the factors that contribute to the dramatic decline of mosquito infection rates  
331 and subsequent cessation of human disease cases in early October, despite the  
332 presence of WNV in bird populations. This phenomenon is likely a combination of  
333 declining temperatures and mosquitoes entering diapause, which would decrease  
334 mosquito abundance and biting activity, thereby reducing interactions between vectors  
335 and vertebrate hosts.

336 Similar to initial studies (15), we identify a distinct geographical gradient in the  
337 prevalence of WNV across Iowa from east to west. The epidemiological importance of  
338 the West is readily evident, where county-level incidence rates in western Iowa were as  
339 much as 60-times higher than those in the East. Additional examination of sentinel  
340 chicken seroprevalence and mosquito infection rates reinforce western Iowa as a region  
341 of epidemiological importance for WNV. Due to the close proximity of Nebraska and  
342 South Dakota, which harbor the highest human WNV incidence rates in the country (1),  
343 our data imply that the western regions of Iowa may be influenced by similar landscape  
344 factors driving WNV transmission as previously suggested (15).

345 Supported by more than 1.9 million individual mosquito records, we have accumulated a  
346 significant body of evidence underscoring the importance of *Cx. tarsalis* in transmitting  
347 WNV to humans and in shaping the hyper-endemic region of western Iowa. This is in  
348 agreement with previous studies that have proposed important roles for *Cx. tarsalis* in  
349 WNV transmission in the Upper Midwest and Northern Great Plains (14, 15, 34, 35).  
350 With similar landscape ecology and strong agricultural emphasis across this region, the  
351 widespread use of irrigation practices likely provide ideal habitats that enable *Cx.*  
352 *tarsalis* to persist through periods of drought (15, 18). This is in contrast to *Cx. pipiens*  
353 group species, which are commonly associated with peridomestic habitats throughout  
354 the United States and have been implicated as the primary vector of WNV in urbanized

355 settings (9, 11, 12, 32). While we cannot exclude the involvement and contributions of  
356 *Cx. pipiens* group in WNV amplification and human infections, the role of *Cx. pipiens*  
357 group mosquitoes is likely that as a secondary vector for WNV transmission in regions  
358 where *Cx. tarsalis* is abundant (summarized in Fig. 6). With Iowa serving as the  
359 easternmost boundary of *Cx. tarsalis* distribution in North America (57), our data  
360 suggest that Iowa serves as an important transition zone, in which *Culex* vector  
361 importance shifts along a gradient from *Cx. pipiens* group mosquitoes in the eastern US  
362 and Chicago (9, 11, 12, 32) to regions of high *Cx. tarsalis* abundance in Iowa and the  
363 Upper Midwest. As a result, highlighting how differences in vector ecology shape  
364 distinct epidemiological regions along an ecological gradient in Iowa provides a rare  
365 opportunity to examine the species-specific dynamics of WNV transmission in multiple  
366 mosquito vectors.

367 In addition, *Culex pipiens* group mosquitoes display distinct seasonality in their  
368 abundance, evidenced by the earlier emergence of *Cx. restuans* before either *Cx.*  
369 *pipiens* or *Cx. salinarius* (20, 58, 59). Previous studies have suggested that *Cx.*  
370 *restuans* may be a comparable or better overall vector of WNV than *Cx. pipiens* (20,  
371 60), such that early season populations of *Cx. restuans* may be integral in establishing  
372 WNV amplification in reservoir populations before other vector species promote  
373 enzootic spillover into human populations. Collectively referred to as *Cx. pipiens* group  
374 in this study, additional efforts should be performed to evaluate the individual  
375 contributions of *Cx. pipiens*, *Cx. restuans*, and *Cx. salinarius* to WNV transmission,  
376 especially in the context of their spatiotemporal dynamics.

377 These differences in vector ecology and abundance are inherently linked to host  
378 selection preferences between mosquito species that influence vector competence.  
379 *Culex* species have generally been classified as ornithophilic, a preference that  
380 promotes frequent interactions with bird reservoirs to acquire and amplify WNV. Several  
381 studies have suggested that *Cx. pipiens* group principally feeds on birds (31, 46, 61,  
382 62), while *Cx. tarsalis* is thought to be more opportunistic, feeding on both birds and  
383 mammals (53, 62, 63). Our data support previous findings in Iowa (64) suggesting that  
384 *Cx. tarsalis* fed on birds more frequently than mosquitoes of the *Cx. pipiens* group.

385 Moreover, our data suggest that *Cx. pipiens* group fed most commonly on mammals,  
386 yet upon further speciation indicate that *Cx. restuans* and *Cx. salinarius* may have  
387 stronger preference for non-human mammals while *Cx. pipiens* feed predominantly on  
388 birds. *Culex* vectors have been shown to shift increasingly toward mammals through the  
389 progression of summer (53, 63–65), a phenomenon that potentially drives epizootic  
390 transmission (27), yet the limited scope of our study does not enable temporal analyses.  
391 However, it is notable that *Cx. tarsalis* fed on humans more frequently than *Cx. pipiens*  
392 group, a potential indicator of greater human host selection by *Cx. tarsalis* that would  
393 support a larger role of this vector species in the transmission of WNV to humans. In  
394 agreement with these studies, the data presented here support a model in which *Cx.*  
395 *pipiens* group mosquitoes predominantly drive enzootic amplification of WNV in  
396 reservoir populations, while *Cx. tarsalis* is more likely to transmit WNV to human  
397 populations (Fig. 6).

398 In summary, our results demonstrate the power and utility of long-term mosquito  
399 surveillance to provide a comprehensive understanding of WNV epidemiology and  
400 transmission. Integrating human case data, sentinel chicken seroprevalence, and  
401 mosquito infection rates, we provide an unprecedented amount of infection data that  
402 enable us to define when and where WNV transmission is most active in the state of  
403 Iowa. Through these studies, we present strong evidence implicating *Cx. tarsalis* as the  
404 primary vector of WNV in Iowa, and identify a unique gradient in vector ecology that  
405 shapes virus transmission in Iowa and the Upper Midwest region. With long-term WNV  
406 surveillance at the local or state-wide level in many places throughout the country, often  
407 with years of unpublished infection and mosquito data, we believe that our study can  
408 serve as a template for similar long-term analyses to better understand WNV  
409 transmission at the regional or state-wide level. Taken together, our results provide an  
410 improved understanding of WNV transmission dynamics in an important epidemiological  
411 region of North America.

#### 412 **Author Contributions**

413 Conceived and designed the experiments: BMD RCS. Contributed data: BMD KBK EJJ  
414 ENF WAR LCB RCS. Performed blood meal analysis: EJJ ENF. Analyzed the data:

415 BMD KBK EJG RCS. Funding and program oversight: WAR, LCB, RCS. Wrote the  
416 initial draft of the manuscript: BMD KBK RCS. Edited the manuscript: BMD LCB RCS.  
417 All authors read and approved the final manuscript.

## 418 **Acknowledgements**

419 This study would not have been possible without the efforts and data collected by many  
420 people that contributed countless hours of labor to the mosquito and WNV surveillance  
421 program over the 15 years of this study. We would like to thank collaborators at the  
422 State Hygienic Lab, particularly Lucy Desjardin and Thomas Gahan, the local public  
423 health partners that assisted in our mosquito surveillance efforts, and the continued  
424 support of Ann Garvey and Julie Coughlin from the Iowa Department of Public Health.  
425 The authors would also like to thank Katherine Goode for statistical consultation, Hee-  
426 Jung Oh for graphic design assistance, and Marilyn O'Hara Ruiz for critical reading of  
427 the manuscript. This research was supported by the Iowa State University Agricultural  
428 Experiment Station, USDA National Institute of Food and Agriculture, Hatch Project  
429 numbers 5033 to WAR (2002-2004), 5111 to LCB (2005-2015) and 101071 to RCS  
430 (2016-current), The Midwest Center of Excellence for Vector-Borne Diseases, and  
431 Epidemiology and Laboratory Capacity for Infectious Diseases (ELC) Program  
432 Components Contract #5887EL11. This publication was supported by Cooperative  
433 Agreement #U01 CK000505, funded by the Centers for Disease Control and  
434 Prevention. Its contents are solely the responsibility of the authors and do not  
435 necessarily represent the official views of the Centers of Disease Control and  
436 Prevention or the Department of Health and Human Services.



## 437 References

- 438 1. Center for Disease Control and Prevention, West Nile virus.  
439 <https://www.cdc.gov/westnile/index.html>
- 440 2. Gray TJ, Webb CE (2014) A review of the epidemiological and clinical aspects of West  
441 Nile virus. *Int J Gen Med* 7:193–203.
- 442 3. Ozdenerol E, Taff GN, Akkus C (2013) Exploring the spatio-temporal dynamics of  
443 reservoir hosts, vectors, and human hosts of west Nile virus: A review of the recent  
444 literature. *Int J Environ Res Public Health* 10(11):5399–5432.
- 445 4. Kramer LD, Styer LM, Ebel GD (2008) A global perspective on the epidemiology of West  
446 Nile virus. *Annu Rev Entomol* 53(1):61–81.
- 447 5. Kilpatrick AM (2011) Globalization, Land Use, and the Invasion of West Nile Virus.  
448 *Science* 334(6054):323–327.
- 449 6. Kilpatrick AM, Daszak P, Jones MJ, Marra PP, Kramer LD (2006) Host heterogeneity  
450 dominates West Nile virus transmission. *Proc R Soc B Biol Sci* 273(1599):2327–2333.
- 451 7. Colpitts TM, Conway MJ, Montgomery RR, Fikrig E (2012) West Nile virus: Biology,  
452 transmission, and human infection. *Clin Microbiol Rev* 25(4):635–648.
- 453 8. Andreadis TG (2012) The Contribution of Culex pipiens Complex Mosquitoes to  
454 Transmission and Persistence of West Nile Virus in North America. *J Am Mosq Control*  
455 *Assoc* 28(4s):137–151.
- 456 9. Andreadis TG, Anderson JF, Vossbrinck CR, Main AJ (2004) Epidemiology of West Nile  
457 Virus in Connecticut: A Five-Year Analysis of Mosquito Data 1999 – 2003. *Vector-Borne*  
458 *Zoonotic Dis* 4(4):360–378.
- 459 10. Ruiz MO, Tedesco C, McTighe TJ, Austin C, Kitron U (2004) Environmental and social  
460 determinants of human risk during a West Nile virus outbreak in the greater Chicago  
461 area, 2002. *Int J Health Geogr* 27(2):93–115.
- 462 11. Levine RS, Mead DG, Kitron UD (2013) Limited spillover to humans from west nile virus  
463 viremic birds in atlanta, georgia. *Vector Borne Zoonotic Dis* 13(11):812–7.
- 464 12. Ruiz MO, Walker ED, Foster ES, Haramis LD, Kitron UD (2007) Association of West Nile  
465 virus illness and urban landscapes in Chicago and Detroit. *Int J Health Geogr* 6(1):10.
- 466 13. Resien WK, et al. (2009) Repeated West Nile Virus Epidemic Transmission in Kern  
467 County, California, 2004–2007. *J Med Entomol* 46(1):139–157.
- 468 14. Bell JA, Brewer CM, Mickelson NJ, Garman GW, Vaughan JA (2006) West Nile Virus  
469 Epizootiology, Central Red River Valley, North Dakota and Minnesota, 2002–2005.  
470 *Emerg Infect Dis*:1245–1247.
- 471 15. DeGroot JP, Sugumaran R, Brend SM, Tucker BJ, Bartholomay LC (2008) Landscape,  
472 demographic, entomological, and climatic associations with human disease incidence of  
473 West Nile virus in the state of Iowa, USA. *Int J Health Geogr* 7(1):19.

- 474 16. Larson SR, DeGroot JP, Bartholomay LC, Sugumaran R (2010) Ecological niche  
475 modeling of potential West Nile virus vector mosquito species in Iowa. *J Insect Sci*  
476 10(1):110.
- 477 17. Gardner AM, Lampman RL, Muturi EJ (2014) Land Use Patterns and the Risk of West  
478 Nile Virus Transmission in Central Illinois. *Vector-Borne Zoonotic Dis* 14(5):338–345.
- 479 18. Schurich J, Kumar S, Eisen L, Moore, Chester G (2014) Modeling *Culex tarsalis*  
480 abundance on the northern Colorado front range using a landscape-level approach. *J Am*  
481 *Mosq Control Assoc* 30(1):7–20.
- 482 19. DeGroot JP, Sugumaran R (2012) National and Regional Associations Between Human  
483 West Nile Virus Incidence and Demographic, Landscape, and Land Use Conditions in the  
484 Coterminous United States. *Vector-Borne Zoonotic Dis* 12(8):657–665.
- 485 20. Johnson BJ, Robson MG, Fonseca DM (2015) Unexpected spatiotemporal abundance of  
486 infected *Culex restuans* suggest a greater role as a West Nile virus vector for this native  
487 species. *Infect Genet Evol* 31:40–47.
- 488 21. Deichmeister JM, Telang A (2011) Abundance of West Nile Virus Mosquito Vectors in  
489 Relation to Climate and Landscape Variables Abundance of West Nile virus mosquito  
490 vectors in relation to climate. 36(1):75–85.
- 491 22. Chuang T-W, Hildreth MB, Vanroekel DL, Wimberly MC (2011) Weather and Land Cover  
492 Influences on Mosquito Populations in Sioux Falls, South Dakota. *J Med Entomol*  
493 48(3):669–679.
- 494 23. Turell MJ, Sardelis MR, Dohm DJ, O'Guinn ML (2001) Potential North American vectors  
495 of West Nile virus. *Ann N Y Acad Sci* 951:317–24.
- 496 24. Goddard LB, Roth AE, Reisen WK, Scott TW, States U (2002) Vector Competence of  
497 California Mosquitoes for. *Emerg Infect Dis* 8(12):1385–1391.
- 498 25. Wimberly MC, Lamsal A, Giacomo P, Chuang TW (2014) Regional variation of climatic  
499 influences on West Nile virus outbreaks in the United States. *Am J Trop Med Hyg*  
500 91(4):677–684.
- 501 26. Paull S, et al. (2017) Drought and immunity determine the intensity of West Nile virus  
502 epidemics and climate change impacts. *Proc R Soc B*. doi:10.1098/rspb.2016.2078.
- 503 27. Kilpatrick AM, Kramer LD, Jones MJ, Marra PP, Daszak P (2006) West Nile virus  
504 epidemics in North America are driven by shifts in mosquito feeding behavior. *PLoS Biol*  
505 4(4):606–610.
- 506 28. Ruiz MO, Tedesco C, McTighe TJ, Austin C, Kitron U (2004) Environmental and social  
507 determinants of human risk during a West Nile virus outbreak in the greater Chicago  
508 area, 2002. *Int J Health Geogr* 27(2):93–115.
- 509 29. Gu W, Lampman R, Kravasin N, Berry R, Novak R (2006) Spatio-temporal Analyses of  
510 West Nile Virus Transmission in *Culex* Mosquitoes in Northern Illinois, USA, 2004.  
511 *Vector-Borne Zoonotic Dis* 6(1):91–98.
- 512 30. Hamer GL, et al. (2008) *Culex pipiens* (Diptera: Culicidae): A Bridge Vector of West Nile  
513 Virus to Humans. *J Med Entomol* 45(1):125–128.

- 514 31. Hamer GL, et al. (2009) Host selection by *Culex pipiens* mosquitoes and west nile virus  
515 amplification. *Am J Trop Med Hyg* 80(2):268–278.
- 516 32. Ruiz MO, et al. (2010) Local impact of temperature and precipitation on West Nile virus  
517 infection in *Culex* species mosquitoes in northeast Illinois, USA. *Parasit Vectors* 3(1):19.
- 518 33. Shand L, et al. (2016) Predicting West Nile Virus Infection Risk from the Synergistic  
519 Effects of Rainfall and Temperature. *J Med Entomol* 53(4):935–944.
- 520 34. Bell JA, Mickelson NJ, Vaughan JA (2005) West Nile Virus in Host-Seeking Mosquitoes  
521 within a Residential Neighborhood in Grand Forks, North Dakota. *Vector Borne Zoonotic*  
522 *Dis* 5(4):373–382.
- 523 35. Wimberly MC, Giacomo P, Kightlinger L, Hildreth MB (2013) Spatio-temporal  
524 epidemiology of human west nile virus disease in South Dakota. *Int J Environ Res Public*  
525 *Health* 10(11):5584–5602.
- 526 36. Chuang TW, Wimberly MC (2012) Remote Sensing of Climatic Anomalies and West Nile  
527 Virus Incidence in the Northern Great Plains of the United States. *PLoS One* 7(10):1–10.
- 528 37. Darsie R, Ward R (2005) *Identification and geographical distribution of the mosquitoes of*  
529 *North America, North of Mexico*. (University Press of Florida).
- 530 38. Dunphy BM, Rowley WA, Bartholomay LC (2014) A Taxonomic Checklist of the  
531 Mosquitoes of Iowa. *J Am Mosq Control Assoc* 30(2):119–121.
- 532 39. Sucaet Y, Van Hemert J, Tucker B, Bartholomay L (2008) A web-based relational  
533 database for monitoring and analyzing mosquito population dynamics. *J Med Entomol*  
534 45(4):775–84.
- 535 40. Biggerstaff B (2006) PooledInfRate, Version 3.0: a Microsoft® Excel® Add-In to compute  
536 prevalence estimates from pooled samples.
- 537 41. Malan AK, Stipanovich PJ, Martins TB, Hill HR, Litwin CM (2003) Detection of IgG and  
538 IgM to West Nile virus: Development of an immunofluorescence assay. *Am J Clin Pathol*  
539 119(4):508–515.
- 540 42. Post RJ, Flook PK, Millest AL (1993) Methods for the preservation of insects for DNA  
541 studies. *Biochem Syst Ecol* 21(1):85–92.
- 542 43. Provost-Javier KN, Chen S, Rasgon JL (2010) Vitellogenin gene expression in  
543 autogenous *Culex tarsalis*. *Insect Mol Biol* 19(4):423–429.
- 544 44. Crabtree M, Savage H, Miller B (1995) Development of a Species-Diagnostic Polymerase  
545 Chain Reaction Assay for the Identification of *Culex* Vectors of St. Louis Encephalitis  
546 Virus Based on Interspecies Sequence Variation in Ribosomal Dna Spacers. *Am J Trop*  
547 *Med Hyg* 53(1):105–109.
- 548 45. Oshaghi MA, Chavshin AR, Vatandoost H (2006) Analysis of mosquito bloodmeals using  
549 RFLP markers. *Exp Parasitol* 114(4):259–264.
- 550 46. Molaei G, Andreadis TG, Armstrong PM, Anderson JF, Vossbrinck CR (2006) Host  
551 feeding patterns of *Culex* mosquitoes and west nile virus transmission, northeastern  
552 United States. *Emerg Infect Dis* 12(3):468–474.

- 553 47. Li L, Losser T, Yorke C, Piltner R (2014) Fast inverse distance weighting-based  
554 spatiotemporal interpolation: A web-based application of interpolating daily fine  
555 particulate matter PM<sub>2.5</sub> in the contiguous U.S. using parallel programming and k-d tree.  
556 *Int J Environ Res Public Health* 11(9):9101–9141.
- 557 48. Healy J, Reisen W, Kramer V, Barker C (2012) Do surveillance methods provide  
558 adequate warning for human infections with West Nile virus. *Proc Pap Mosq Vector*  
559 *Control Assoc Calif* 80:17–18.
- 560 49. Division of Vector-Borne Diseases (2013) West Nile Virus in the United States:  $\square$ :  
561 Guidelines for Surveillance, Prevention, and Control.  
562 <http://www.cdc.gov/westnile/resources/pdfs/wnvGuidelines.pdf>.
- 563 50. Williams GM, Gingrich JB (2007) Comparison of light traps, gravid traps, and resting  
564 boxes for West Nile virus surveillance. *J Vector Ecol* 32(2):285–291.
- 565 51. Bolling BG, Moore CG, Anderson SL, Blair CD, Beaty BJ (2007) Entomological Studies  
566 Along the Colorado Front Range During a Period of Intense West Nile Virus Activity. *J*  
567 *Am Mosq Control Assoc* 23(1):37–46.
- 568 52. Turell MJ, et al. (2005) An Update on the Potential of North American Mosquitoes  
569 (Diptera: Culicidae) to Transmit West Nile Virus. *J Med Entomol* 42(1):57–62.
- 570 53. Kent R, Juliusson L, Weissmann M, Evans S, Komar N (2009) Seasonal Blood-Feeding  
571 Behavior of *Culex tarsalis* (Diptera: Culicidae) in Weld County, Colorado, 2007. *J*  
572 *Med Entomol* 46(2):380–390.
- 573 54. Kent RJ, Norris DE (2005) Identification of mammalian blood meals in mosquitoes by a  
574 multiplexed polymerase chain reaction targeting cytochrome B. *Am J Trop Med Hyg*  
575 73(2):336–342.
- 576 55. Vandyk JK, Rowley WA (1995) Response of Iowa mosquito populations to unusual  
577 precipitation patterns as measured by New Jersey light trap collections. *J Am Mosq*  
578 *Control Assoc* 11(2 Pt 1):200–205.
- 579 56. Petersen LR, Brault AC, Nasci RS (2013) West Nile virus: review of the literature. *JAMA*  
580 310(3):308–15.
- 581 57. Venkatesan M, Rasgon JL (2010) Population genetic data suggest a role for mosquito-  
582 mediated dispersal of West Nile virus across the western United States. *Mol Ecol*  
583 19(8):1573–1584.
- 584 58. Lee JH, Rowley WA (2000) The abundance and seasonal distribution of *Culex*  
585 mosquitoes in Iowa during 1995–97. *J Am Mosq Control Assoc* 16(4):275–278.
- 586 59. Kunkel KE, Novak RJ, Lampman RL, Gu W (2006) Modeling the impact of variable  
587 climatic factors on the crossover of *Culex restuans* and *Culex pipiens* (Diptera:  
588 Culicidae), vectors of West Nile virus in Illinois. *Am J Trop Med Hyg* 74(1):168–173.
- 589 60. Ebel GD, Rochlin I, Longacker J, Kramer LD (2005) *Culex restuans* (Diptera: Culicidae)  
590 relative abundance and vector competence for West Nile Virus. *J Med Entomol*  
591 42(5):838–843.
- 592 61. Montgomery MJ, Thiemann T, Macedo P, Brown DA, Scott TW (2011) Blood-Feeding

- 593            Patterns of the *Culex pipiens* Complex in Sacramento and Yolo Counties, California. *J*  
594            *Med Entomol* 48(2):398–404.
- 595    62.    Thiemann TC, et al. (2012) Spatial variation in host feeding patterns of *Culex tarsalis* and  
596            the *Culex pipiens* complex (Diptera: Culicidae) in California. *J Med Entomol* 49(4):903–  
597            16.
- 598    63.    Tempelis CH, Reeves WC, Bellamy RE, Lofy MF (1965) A three-year study of the feeding  
599            habits of *Culex tarsalis* in Kern County, California. *Am J Trop Med Hyg* 14(1):170–177.
- 600    64.    Ritchie SA, Rowley WA (1981) Blood-Feeding Patterns of Iowa Mosquitoes. *Mosq News*  
601            41(2):271–275.
- 602    65.    Tempelis CH, Francy DB, Hayes RO, Lofy MF (1967) Variations in feeding patterns of  
603            seven culicine mosquitoes on vertebrate hosts in Weld and Larimer Counties, Colorado.  
604            *Am J Trop Med Hyg* 16(1):111–119.
- 605    66.    Landesman WJ, Allan BF, Langerhans RB, Knight TM, Chase JM (2007) Inter-Annual  
606            Associations Between Precipitation and Human Incidence of West Nile Virus in the  
607            United States. *Vector Borne Zoonotic Disease* 7(3): 337-343.
- 608    67.    Karki S, Westcott NE, Muturi EJ, Brown WM, Ruiz MO (2017) Assessing human risk of  
609            illness with West Nile virus mosquito surveillance data to improve public health  
610            preparedness. *Zoonoses Public Health* (May):1–8.
- 611

## 612 **Figure legends**

613 **Figure 1. Seasonality of WNV transmission in human, avian, and mosquito hosts.**  
614 WNV infection data from Iowa (2002-2016) were analyzed and displayed as weekly  
615 values for individual years or as the annual mean of human incidence (A), sentinel  
616 chicken seroprevalence (B), or *Culex* minimum infection rate (MIR) (C). Correlations  
617 between different host (human, avian, mosquito) infection rates were examined by  
618 plotting averaged weekly values (weeks 20-40; data points on graph) to determine the  
619 strength of host interactions involved in WNV transmission (D-F). A linear regression  
620 (black dashed line;  $R^2=0.45$ ,  $P < 0.001$ ) or a best-fit 4<sup>th</sup> order polynomial (green line;  
621  $R^2=0.94$ ,  $P < 0.0001$ ) were used to explain sentinel chicken seroprevalence correlations  
622 to human incidence (D). Similar linear regression (black dashed line;  $R^2=0.63$ ,  $P < 0.001$ )  
623 and best-fit 4<sup>th</sup> order polynomial (purple line;  $R^2=0.86$ ,  $P < 0.0001$ ) were performed to  
624 examine the effects of *Culex* MIR in estimating sentinel chicken seroprevalence (E).  
625 The non-linear relationship best explains the declining human incidence or mosquito  
626 MIR, while sentinel chicken seroprevalence remained high at the end of the season (E).  
627 Linear regression (orange line;  $R^2=0.71$ ,  $P < 0.0001$ ) analysis of *Culex* MIR and human  
628 WNV incidence (F).

629 **Figure 2. Spatial distributions of WNV in human, avian, and mosquito hosts.**  
630 WNV infections from 2002 -2016 are displayed at the county level and spatially  
631 presented as the annual mean of human incidence (A), sentinel chicken seroprevalence  
632 (B), or *Culex* MIR (C) across the state. Additional analyses display the annual mean or  
633 weekly infection rates by regional associations in Iowa – western, central, and eastern  
634 (A-C). Human incidence (A) is displayed as the number of human WNV cases per  
635 100,000 people. Sentinel chicken seroprevalence (B) is defined as the ratio of WNV<sup>+</sup>  
636 seropositive birds per total birds sampled. *Culex* MIR (C) is calculated as the minimum  
637 infection rate for all *Culex* mosquito vectors (*Cx. pipiens* group, *Cx. tarsalis*, and *Cx.*  
638 *erraticus*). The black dots display counties in which chicken seroprevalence and  
639 mosquito infection rate data were collected. A Wilcoxon matched-pairs signed rank test  
640 was used to test for differences between groups with significance denoted by asterisks  
641 (\* $P < 0.05$ , \*\* $P < 0.01$ , \*\*\* $P < 0.001$ ). ns, not significant.

642 **Figure 3. WNV surveillance reveals mosquito trapping bias and greater infection**  
643 **rates in *Cx. tarsalis*.** (A) Gravid trap yields of *Cx. tarsalis* (red) and *Cx. pipiens* group  
644 (blue) show significant trap bias toward collecting container-breeding *Cx. pipiens* group  
645 mosquitoes. Mean annual minimum infection rates (MIR) of *Cx. tarsalis* and *Cx. pipiens*  
646 group collected from gravid traps (B). Only two years of substantial *Cx. tarsalis* yields  
647 were collected as a result of this trapping bias, resulting in a large margin of error (B). In  
648 contrast, CDC trap yields of *Cx. tarsalis* (red) and *Cx. pipiens* group (blue) showed a  
649 more even sampling of the two vectors (C), in which the mean annual MIR of *Cx.*  
650 *tarsalis* were significantly higher in CDC trap collections (D). The Wilcoxon matched-  
651 pairs signed test was used to test for differences between groups. Significant  
652 differences are indicated by asterisks (\*\* $P < 0.01$ ). ns, not significant.

653 **Figure 4. Identification of mosquito blood meals.**

654 PCR-based methods were used to identify the blood meal source of collected *Cx.*  
655 *tarsalis* and *Cx. pipiens* group samples. The percentage of blood meals taken  
656 respectively from birds, humans, and non-human mammals are displayed for each  
657 mosquito species. The total number (n) of identified blood meals is displayed below.

658 **Figure 5. *Cx. tarsalis* abundance significantly correlates with human WNV**  
659 **incidence.** Mosquito abundance data collected from CDC traps (A and C) or New  
660 Jersey light traps (NJLTs) (B and D) were examined spatially across Iowa. County-  
661 specific mosquito datasets were calculated from historical data (2002-2016). Mosquito  
662 abundance was measured as a ratio of either *Cx. tarsalis* (A and B) or *Cx. pipiens* group  
663 (CPG) (C and D) mosquitoes to the total yield of mosquitoes (all species) collected.  
664 Each figure shows a county-specific visual display of mosquito abundance in the state  
665 (left) and the relationship of abundance values to human WNV incidence (right). Linear  
666 regressions were performed to test the strength of the relationship between mosquito  
667 abundance and human WNV incidence, with associated  $R^2$  and  $P$ - values displayed for  
668 each correlation.

669 **Figure 6. Model of WNV transmission dynamics in Iowa.**

670 *Culex* mosquito populations are believed to maintain and amplify WNV in bird  
671 reservoirs, with spillover events into human populations primarily occurring through *Cx.*

672 *tarsalis*. *Cx. pipiens* group mosquitoes are believed to have a secondary role in human  
673 cases.



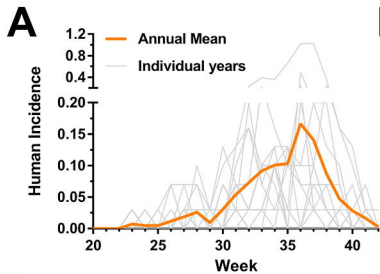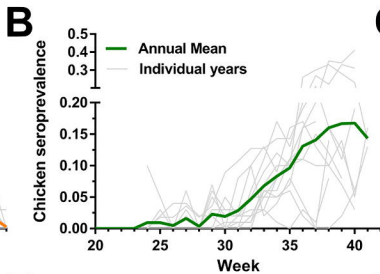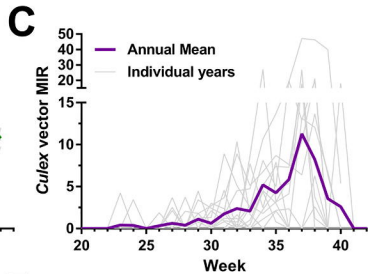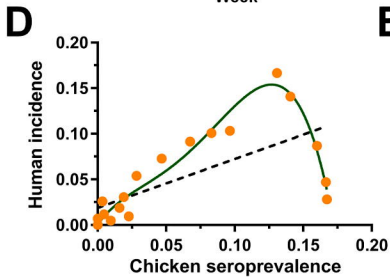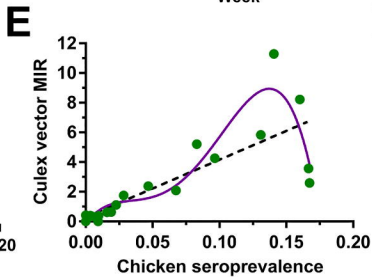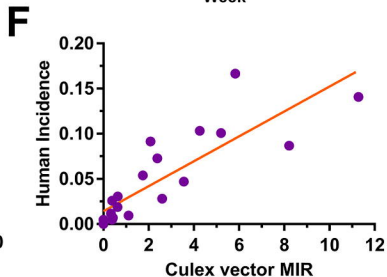

**A**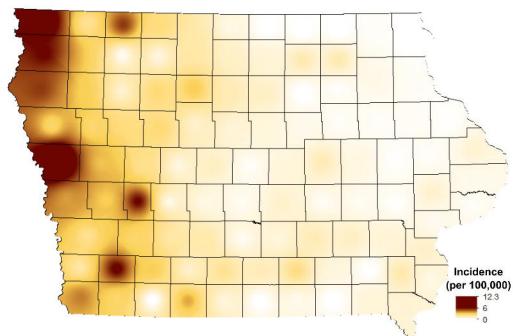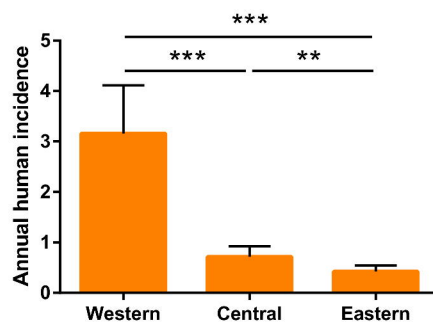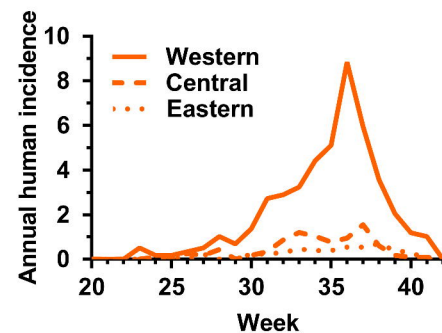**B**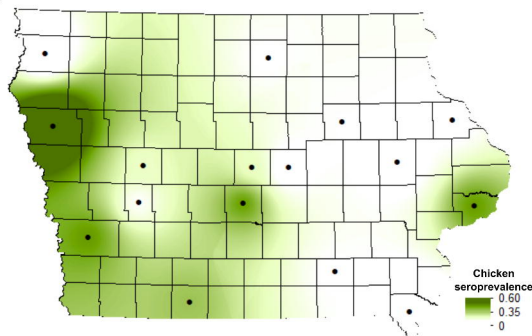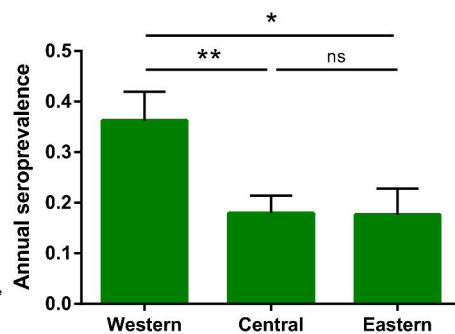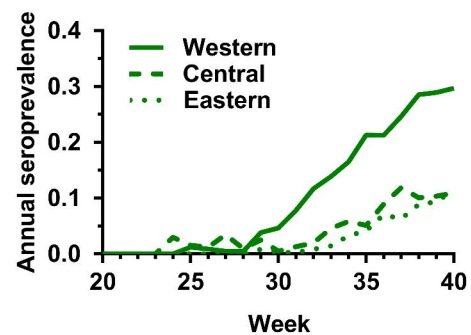**C**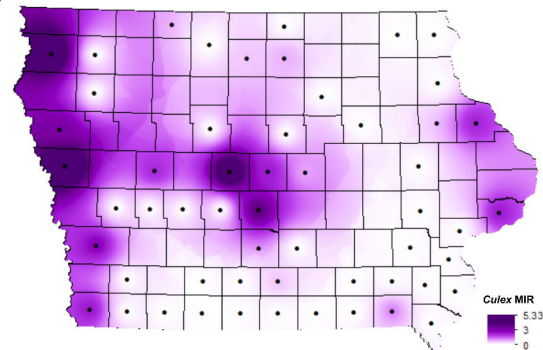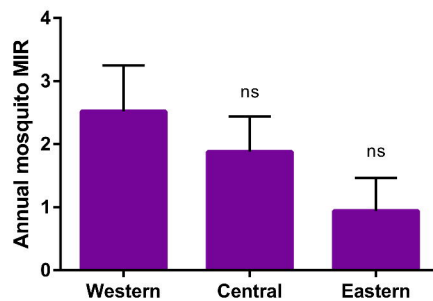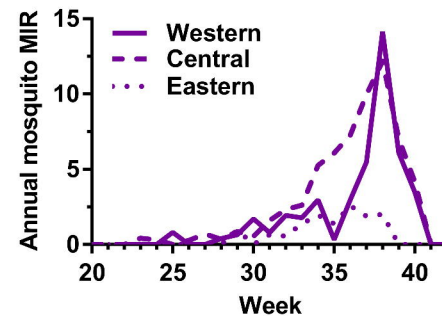

**A**

Gravid trap

 *Cx. tarsalis* *Cx. pipiens* group

Total = 93,456

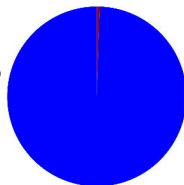**B**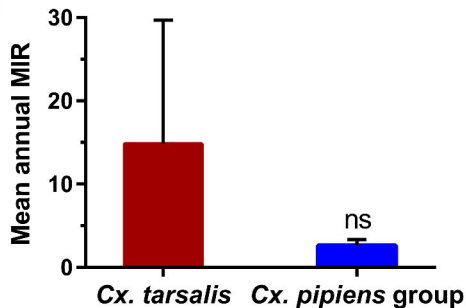**C**

CDC trap

 *Cx. tarsalis* *Cx. pipiens* group

Total = 65,341

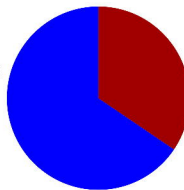**D**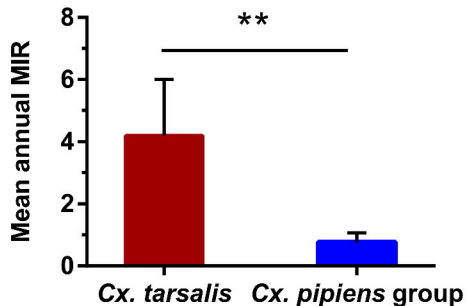

### *Cx. tarsalis*

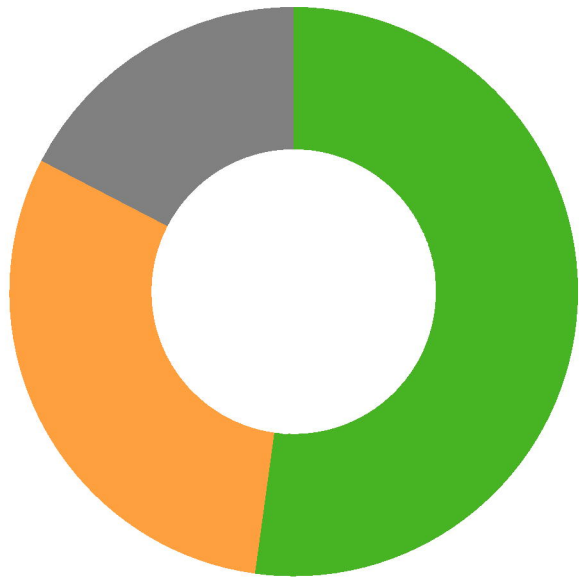

Total=23

### *Cx. pipiens* group

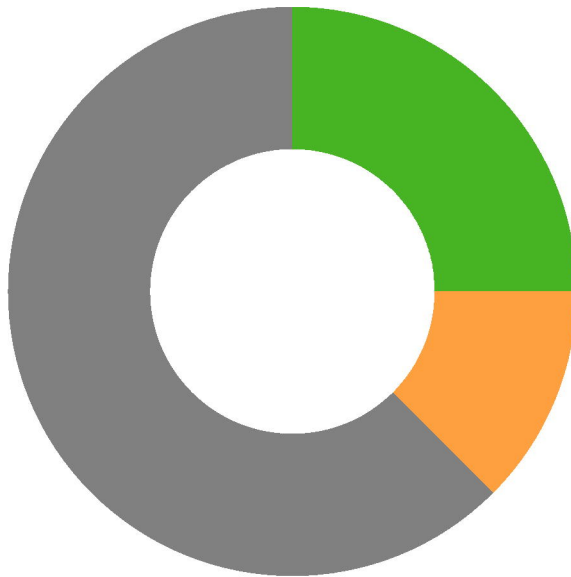

Total=32

- Bird
- Human
- Mammal

**A**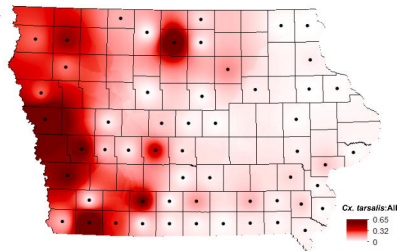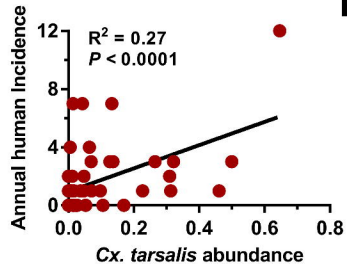**B**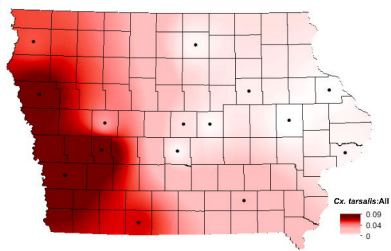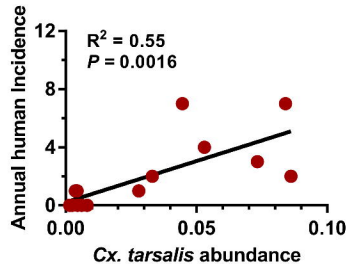**C**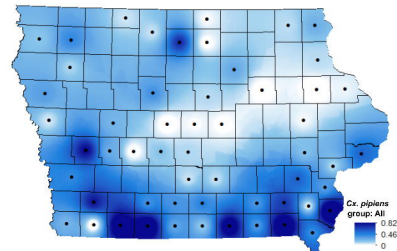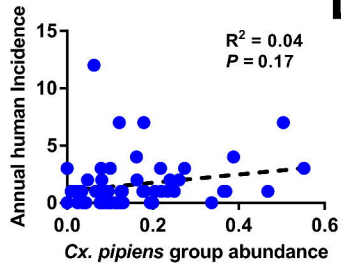**D**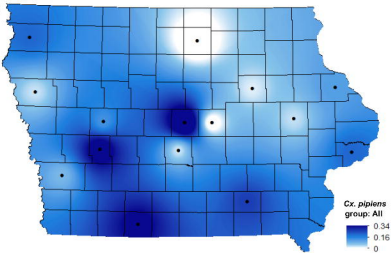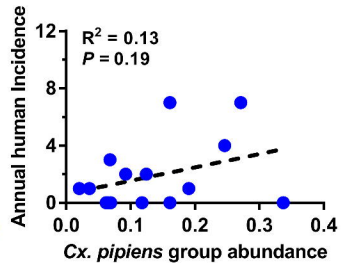

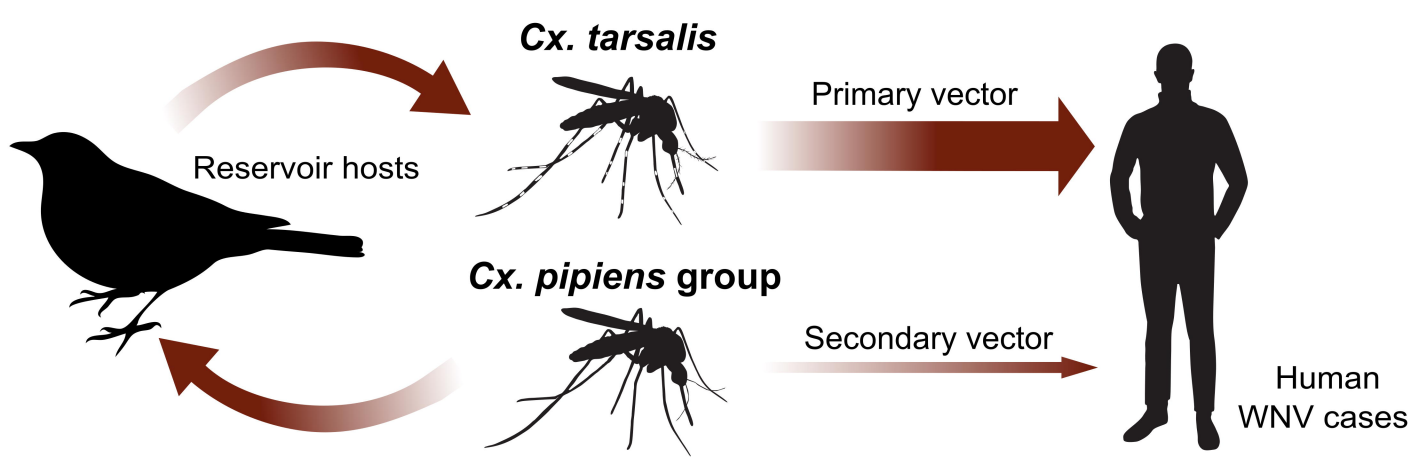

Source: https://www.biorxiv.org/content/10.1101/476234v2.full.pdf
